# Supplementary material
Source: HighWire-hosted journal article supplement (https://bmjopen.bmj.com/content/14/8/e082585)
Supplement: inline-supplementary-material-1 [file inline-supplementary-material-1.pdf]

| Supplemental Table 1. Prevalence of 23 maternal diseases |        |       |
|----------------------------------------------------------|--------|-------|
| Condition                                                | n      | %     |
| Abnormal pre-pregnancy BMI                               |        |       |
| Underweight (BMI <18.5 kg/m2)                            | 12,889 | 15.6  |
| Obesity (BMI >25.0 kg/m2)                                | 8,848  | 10.7  |
| Allergic disease                                         | 2,557  | 3.1   |
| Anaemia                                                  | 592    | 0.7   |
| Diabetes mellitus                                        | 124    | 0.2   |
| Domestic violence                                        | 3,632  | 4.4   |
| Dyslipidaemia                                            | 6      | 0.01  |
| Epilepsy                                                 | 122    | 0.2   |
| Gastric or duodenal ulcer                                | 285    | 0.3   |
| Heart disease                                            | 7      | 0.01  |
| Hepatitis                                                | 5      | 0.01  |
| HIV infection                                            | 7      | 0.01  |
| Hypertension                                             | 83     | 0.1   |
| Inflammatory bowel disease                               | 16     | 0.02  |
| Kidney disease                                           | 17     | 0.02  |
| Malignancy                                               | 0      | 0     |
| Migraine                                                 | 41     | 0.05  |
| Neurological disease                                     | 0      | 0     |
| Other sexually transmitted diseases                      | 1,089  | 1.3   |
| Mental disorder                                          | 550    | 0.7   |
| Rheumatic or collagen disease                            | 91     | 0.1   |
| Substance abuse                                          | 1      | 0.001 |
| Thyroid disease                                          | 614    | 0.7   |
| BMI, body mass index.                                    |        |       |
